# Supplementary material for: miRNome of Child A hepatocellular carcinoma in Egyptian patients
Source: Front Oncol. 2023 Apr 24;13:1137585. doi: 10.3389/fonc.2023.1137585 (PMC10164962; doi:10.3389/fonc.2023.1137585)
Supplement: Supplementary file 1 [file Table_1.xlsx]

## Sheet: number of reads
Sample name		Number of reads per million	Sample name	Number of reads per million
HCC14-S16	1.1		HCC7-S18	1.1
HCC15-S19	1.1		HCC8-S5	0.7
HCC16-S17	1.5		HCC9-S10	0.9
HCC18-S13	1		N17-S2	0.5
HCC19-S3	0.9		N18-S8	0.7
HCC20-S12	0.5		N19-S4	1.1
HCC21-S14	1.6		N21-S9	0.7
HCC22-S21	1.4		N24-S20	0.8
HCC23-S6	0.9		N8-S1	0.9
HCC24-S15	1.2
HCC25-S7	0.9
HCC26-S11	0.6
Supplementary Table (1): Represent number of reads per million for hepatocellular carcinoma tissues (HCC) and
control tissues (N).
