# Supplementary material for: miRNome of Child A hepatocellular carcinoma in Egyptian patients
Source: Front Oncol. 2023 Apr 24;13:1137585. doi: 10.3389/fonc.2023.1137585 (PMC10164962; doi:10.3389/fonc.2023.1137585)
Supplement: Supplementary file 2 [file Table_2.xlsx]

## Sheet: diagnostic performance
						Asymptotic
	Cutoff point	Sn.	Sp.	AUC	S.E	95% C.I		P. value
						Lower Bound	Upper Bound
hsa-miR-4488	0.193	73.3	66.7	0.778	0.101	0.58	0.976	0.050*
hsa-miR-3178	0.151	66.7	100	0.833	0.087	0.662	1	0.020*
hsa-miR-3182	0.302	66.7	83.3	0.794	0.097	0.605	0.984	0.039*
hsa-miR-214	50.99	100	80	0.911	0.063	0.787	1	0.004**
Supplementary Table (2): Diagnostic performance for the studied DEMs in the studied samples. Sn: Sensitivity,
Sp: Specificity, AUC Area under curve and C.I: 95% Confidence Interval. * p value <0.05 is significant, ** p value
<0.01 is highly significant.
