# Supplementary material for: miRNome of Child A hepatocellular carcinoma in Egyptian patients
Source: Front Oncol. 2023 Apr 24;13:1137585. doi: 10.3389/fonc.2023.1137585 (PMC10164962; doi:10.3389/fonc.2023.1137585)
Supplement: Supplementary file 3 [file Table_3.xlsx]

## Sheet: prognostic performance
	Studied groups Control	HCC	P. value	Prognostic performance OR (95% C.I)	P. value
hsa-miR-4488	0.00001(0.00001- 1.31084)	2.24450(0.00001- 4.99893)	0.045*	2.177 (0.783- 6.055)	0.136
hsa-miR-3178	0.00001(0.00001- 0.00001)	1.99957(0.00001- 3.77423)	0.012*	0.923( 0.243- 1.023)	0.981
hsa-miR-3182	0.00001(0.000010.19442- )	2.18028(0.00001- 3.86148)	0.029*	4.596 (0.492- 42.893)	0.181
hsa-miR-214	112.9(58.01- 172.4)	14.0(4.4- 46.6)	0.002**	0.963(0.931- 0.996)	0.029*
Supplementary Table (3): Median of the studied miRNAs with its prognostic performance ability. The studied miRNAs
are represented as Median and Interquartile Range (IR) (25% -75%); the data were analyzed by Mann-Whitney U
test.OR; Odd Ratio, C.I; Confidence Interval, p value of Prognostic viability is calculated depending on logistic
regression analysis.* p. value <0.05 is significant, ** p. value <0.01 is highly significant.
